# Supplementary material for: Engineering Flocculation for Improved Tolerance and Production of d-Lactic Acid in Pichia pastoris
Source: MDPI journal article supplement (doi:10.3390/jof9040409), 2023-03-27
Supplement: s1 [file s1]

**Supporting Information for Engineering Flocculation for Improved Tolerance and Production of D-lactic Acid in *Pichia pastoris***

**Kittapong Sae-Tang <sup>1</sup>, Pornsiri Bumrungham <sup>1</sup>, Wuttichai Mhuantong <sup>1</sup>, Verawat Champreda <sup>1</sup>,  
Sutipa Tanapongpipat <sup>1</sup>, Xin-Qing Zhao <sup>2</sup>, Chen-Guang Liu <sup>2</sup> and Weerawat Runguphan <sup>1,\*</sup>**

<sup>1</sup> National Center for Genetic Engineering and Biotechnology, 113 Thailand Science Park, Paholyothin Road, Klong 1, Klong Luang, Pathum Thani 12120, Thailand

<sup>2</sup> State Key Laboratory of Microbial Metabolism, Joint International Research Laboratory of Metabolic & Developmental Sciences, School of Life Sciences and Biotechnology, Shanghai Jiao Tong University, Shanghai 200240, China

\* Correspondence: weerawat.run@biotec.or.th

**Table S1. Primers used in this study**

| Primer Name      | Sequence (5' to 3')                                          |
|------------------|--------------------------------------------------------------|
| Flo1-hom-F       | CCGTCTCGGATCGGTACCTCGAGCCGCGGCGGCCGCGAAACGATGACAATGCCTCATCGC |
| Flo1-hom-R       | TCAGATCCTCTTCTGAGATGAGTTTTTGTTCGGGCCCTTAAATAATTGCCAGCAATAAGG |
| ScFlo1-5'Seq-R   | TAATAGTAGCCAGCGTAC                                           |
| ScFlo1-3'Seq-F   | TTAGCGGCGTCACAACAG                                           |
| LpDLDH-F         | ATATGGTACCGAAACGATGAAGATCTTCGCTTATGG                         |
| LpDLDH-R         | ATATGCGGCCGCTTAGTACTTAACAGCAATAGC                            |
| PpJEN1_EcoRI-F   | ATAGAATTCATGTCTGCATTCAATCCATTC                               |
| PpJEN1_NotI-R    | ATAGCGGCCGCTTACTTATTTCTTCAAAAGC                              |
| PpADY2-2_EcoRI-F | ATAGAATTCATGTCTACTCATCAAGATATC                               |

|                  |                                       |
|------------------|---------------------------------------|
| PpADY2-2_NotI-R  | ATAGCGGCCGCTTAGACATAAAAACCTGCTTG      |
| PpADY2-1_EcoRI-F | ATAGAATTCATGGCTGATAATTATAGTATTAAG     |
| PpADY2-1_NotI-R  | ATAGCGGCCGCCTATTTGGTTCGGAGACC         |
| PpFps1_EcoRI-F   | ATAGAATTCATGTCATATTCAAACCCACAA        |
| PpFps1_NotI-R    | ATAGCGGCCGCCTAGGCAATAGTTGGAGC         |
| PpAcXp_EcoRI-F   | ATAGAATTCATGTCCGAATCTCCGAAT           |
| PpAcXp_NotI-R    | ATAGCGGCCGCTTAAATAATATAGTTCTTGATATAGA |
| PpFeRed_EcoRI-F  | ATAGAATTCATGCTACAATTTATTCCTGTG        |
| PpFeRed_NotI-R   | ATAGCGGCCGCTTACCATAACTCCAATTCTTC      |
| PpFerXp_EcoRI-F  | ATAGAATTCATGTCTGCTGAATCTGTG           |
| PpFerXp_NotI-R   | ATAGCGGCCGCTCAAAGTTTGAAAAGGTTTCAT     |
| PpLAFeXp_EcoRI-F | ATAGAATTCATGGGCTTCTGGAGAAAT           |
| PpLAFeXp_NotI-R  | ATAGCGGCCGCCTAAAGCTGATCTACATACTG      |
| PpFeO2OR_EcoRI-F | ATAGAATTCATGTTTGTATTCTGAACCAG         |
| PpFeO2OR_NotI-R  | ATAGCGGCCGCTCAGTTCAATAACTCAGTTG       |
| PpLAZnXp_EcoRI-F | ATAGAATTCATGTTATTCCCTAGAGAAACC        |
| PpLAZnXp_NotI-R  | ATAGCGGCCGCTTAGGCCCATTTTCCAAG         |
| PpHATPase_XhoI-F | ATACTCGAGATGTCCGCTGAAGAGCCA           |
| PpHATPase_NotI-R | ATAGCGGCCGCTTAACCAGACTTCTCGTGCTG      |

|                  |                                    |
|------------------|------------------------------------|
| PpSUR1_EcoRI-F   | ATAGAATTCATGAAAACAGAGCTTAAGATC     |
| PpSUR1_NotI-R    | ATAGCGGCCGCTACATGGGTTGGTTCAT       |
| PpHAZnXp_EcoRI-F | ATAGAATTCATGAATTTGAAAACCTTGGATTACT |
| PpHAZnXp-hom1-R  | GCTGGCTTCAGCTCCAAGGGAAACAAATTGGACT |
| PpHAZnXp-hom2-F  | CCAATTTGTTTCCCTTGGAGCTGAAGCCAGCAG  |
| PpHAZnXp_NotI-R  | ATAGCGGCCGCTTATGCCCATTTACCAAGCACAC |

**Table S2. Selected differentially expressed genes identified from transcriptomic analysis**

| Gene ID                  | Log2FoldChange | P <sub>adj</sub> | Genbank Accession | Product                                                                                                         |
|--------------------------|----------------|------------------|-------------------|-----------------------------------------------------------------------------------------------------------------|
| <b>Upregulated genes</b> |                |                  |                   |                                                                                                                 |
| <b>Transport</b>         |                |                  |                   |                                                                                                                 |
| gene-PAS_chr4_0836       | 0.387376818    | 0.02229365       | XM_002494240.1    | Polyamine transport protein, recognizes spermine, putrescine, and spermidine (homolog to <i>ScTPO2/ScTPO3</i> ) |
| gene-PAS_chr3_0440       | 1.175922768    | 8.07E-15         | XM_002492622.1    | Lactate transporter (homolog of <i>ScJEN1</i> )                                                                 |
| gene-PAS_chr1-1_0378     | 1.121604232    | 3.38E-07         | XM_002489992.1    | Putative transmembrane protein involved in export of ammonia (homolog of <i>ScADY2</i> )                        |
| gene-PAS_chr1-1_0418     | 0.80951578     | 0.00092879       | XM_002490032.1    | Acetate transporter required for normal sporulation (homolog of <i>ScADY2</i> )                                 |
| gene-PAS_chr2-1_0874     | 1.314475951    | 1.41E-11         | XM_002491529.1    | hypothetical protein (homolog of <i>ScADY2</i> and <i>ScATO2/ScATO3</i> )                                       |
| gene-PAS_chr4_0832       | 0.776259912    | 5.87E-08         | XM_002494235.1    | Plasma membrane ATP-binding cassette (ABC) transporter (homolog of <i>ScPDR12</i> )                             |
| gene-PAS_chr4_0784       | 1.131804182    | 3.51E-18         | XM_002494184.1    | Putative channel-like protein (homolog of <i>ScFps1</i> )                                                       |
| gene-PAS_chr2-1_0649     | 1.286738148    | 4.01E-14         | XM_002491528.1    | Acetate transporter required for normal sporulation                                                             |
| <b>Iron metabolism</b>   |                |                  |                   |                                                                                                                 |

|                             |              |           |                |                                                                                                         |
|-----------------------------|--------------|-----------|----------------|---------------------------------------------------------------------------------------------------------|
| gene-PAS_chr4_0240          | 2.768506107  | 5.12E-72  | XM_002493603.1 | Ferric reductase, reduces siderophore-bound iron prior to uptake by transporters                        |
| gene-PAS_chr3_0662          | 2.945776706  | 2.82E-156 | XM_002492843.1 | Ferrioxamine B transporter                                                                              |
| gene-PAS_chr2-2_0009        | 1.945055952  | 2.69E-07  | XM_002492163.1 | Low-affinity Fe(II) transporter of the plasma membrane                                                  |
| gene-PAS_chr2-1_0787        | 1.926646843  | 5.48E-48  | XM_002491680.1 | Ferro-O2-oxidoreductase                                                                                 |
| <b>Zinc metabolism</b>      |              |           |                |                                                                                                         |
| gene-PAS_chr3_0516          | 4.806211183  | 2.44E-112 | XM_002492699.1 | High-affinity zinc transporter of the plasma membrane                                                   |
| gene-PAS_chr4_0516          | 2.657951151  | 2.52E-102 | XM_002493905.1 | Low-affinity zinc transporter of the plasma membrane                                                    |
| <b>H<sup>+</sup>-ATPase</b> |              |           |                |                                                                                                         |
| gene-PAS_chr1-1_0002        | 1.043159543  | 4.61E-23  | XM_002489588.1 | Plasma membrane H <sup>+</sup> -ATPase, pumps protons out of the cell                                   |
| <b>Cell wall rigidity</b>   |              |           |                |                                                                                                         |
| gene-PAS_chr1-3_0218        | 2.020911229  | 9.73E-21  | XM_002489517.1 | Probable catalytic subunit of a mannosylinositol phosphorylceramide (MIPC) synthase (homolog of ScSUR1) |
| <b>Downregulated genes</b>  |              |           |                |                                                                                                         |
| <b>Transporter</b>          |              |           |                |                                                                                                         |
| gene-PAS_chr1-1_0398        | -2.022988078 | 2.64E-38  | XM_002490011.1 | Plasma membrane ATP binding cassette (ABC) transporter (Homolog of ScPDR12)                             |
| gene-PAS_chr1-4_0431        | -2.357365091 | 5.67E-27  | XM_002490517.1 | Plasma membrane multidrug transporter of the major facilitator superfamily (homolog to ScTPO2/TPO3)     |
| gene-PAS_chr1-3_0215        | -1.003365594 | 6.09E-08  | XM_002489514.1 | Polyamine transport protein specific for spermine (homolog for ScTPO2/TPO3)                             |
| gene-PAS_chr2-1_0309        | -2.345279323 | 3.79E-146 | XM_002491159.1 | Protein with similarity to mammalian monocarboxylate permeases (homolog to ScESBP6)                     |
| <b>Cell wall rigidity</b>   |              |           |                |                                                                                                         |
| gene-PAS_chr3_0278          | -2.016503103 | 2.65E-49  | XM_002492451.1 | Protein with similarity to monocarboxylate permeases (Homolog of ScESBP6)                               |
| gene-PAS_chr2-1_0309        | -2.345279323 | 3.79E-146 | XM_002491159.1 | Protein with similarity to mammalian monocarboxylate permeases (homolog to ScESBP6)                     |
| gene-PAS_chr1-4_0132        | -3.481877776 | 2.26E-137 | XM_002490196.1 | Protein with similarity to mammalian monocarboxylate permease (Homolog of ScESBP6)                      |

**Table S3. Effects of various lactic acid concentrations in YPD medium (liquid culture) on specific growth rates of *P. pastoris* with or without *ScFLO1* overexpression.**

| Lactic acid concentration (g/L) | Specific growth rate (h <sup>-1</sup> ) |                 |
|---------------------------------|-----------------------------------------|-----------------|
|                                 | KM71                                    | KM71-ScFlo1     |
| 0                               | 0.1221 ± 0.0011                         | 0.1211 ± 0.0011 |
| 5                               | 0.1119 ± 0.0002                         | 0.1108 ± 0.0006 |
| 10                              | 0.0825 ± 0.0011                         | 0.0825 ± 0.0004 |
| 12                              | 0.0715 ± 0.0003                         | 0.0751 ± 0.0002 |
| 14                              | 0.0475 ± 0.0000                         | 0.0561 ± 0.0002 |
| 16                              | 0.0195 ± 0.0003                         | 0.0318 ± 0.0004 |
| 18                              | 0.0097 ± 0.0003                         | 0.0132 ± 0.0003 |
| 20                              | 0.0057 ± 0.0002                         | 0.0078 ± 0.0003 |
